# Supplementary material for: Deep sea anaerobic microbial community couples the degradation of insoluble chitin to extracellular electron transfer
Source: Research Square preprint supplement (doi:10.21203/rs.3.rs-7153510/v1), 2025-07-25
Supplement: Supplementary file 1 [file ec030f056e09b3f28febf44a.pdf]

1 **Supplementary Materials**

2 ***Deep sea anaerobic microbial community couples insoluble chitin degradation to extracellular***  
3 ***electron transfer***

4

5 Yamini Jangir<sup>a,b&1</sup>, Sujung Lim<sup>a&</sup>, Fabai Wu<sup>a,b&</sup>, Yongzhao Guo<sup>a</sup>, Stephanie Connon<sup>a</sup>, Sammy Pontrelli<sup>c&</sup>, Julia  
6 Schwartzman<sup>d&</sup>, Uwe Sauer<sup>c</sup>, Otto Cordero<sup>d</sup>, and Victoria Orphan<sup>a,b1</sup>

7

8 **Affiliations**

9 <sup>a</sup>*Division of Geological and Planetary Sciences, California Institute of Technology, Pasadena, CA 91125, USA*

10 <sup>b</sup>*Division of Biology and Biological Engineering, California Institute of Technology, Pasadena, CA 91125, USA*

11 <sup>c</sup>*Institute of Molecular Systems Biology, ETH Zürich, Zurich 8093, Switzerland*

12 <sup>d</sup>*Department of Civil and Environmental Engineering, Massachusetts Institute of Technology, Cambridge, MA*  
13 *02139, USA.*

14

15 <sup>1</sup>correspondence: [jangir@caltech.edu](mailto:jangir@caltech.edu) / [jangir@iitk.ac.in](mailto:jangir@iitk.ac.in) (YJ), [vorphan@caltech.edu](mailto:vorphan@caltech.edu) (VJO)

16

17

18

19

20

21

22

23

24 <sup>&</sup>*Present Address:*

25 Yamini Jangir, Indian Institute of Technology, Kanpur, Uttar Pradesh, India

26 Sujung Lim, University of Nevada, Las Vegas, NV, USA

27 Fabai Wu, Easter Institute of Technology, Ningbo, China

28 Sammy Pontrelli, VIB-KU Leuven Center for Microbiology, Leuven, Belgium

29 Julia Schwartzman, Biological Sciences, University of Southern California, Los Angeles, CA, USA

30

## Supplementary Materials

### Anoxic seafloor sediment abundant in putative chitin degraders and iron reducers

A geochemical analysis of a background sediment core, located less than 2 m distance from SL12123, revealed the highest concentration of Fe (II) (0.13 mM) at a depth of 1–3 cm (see Figure 1b). Additionally, sediment was collected from a depth of 1–2 cm at the whale fall site WF1018 (36.771442 N, 122.082998 W) in December 2018 to probe anaerobic chitin dynamics in marine sediments.

At the community level (refer to Supplementary Fig. 1), analysis of nine representative (2 x SL12122, 3 x SL12123, 2 x SL-12124, 2 x SL12125) sediment samples indicated that the predominant archaeal lineage, comprising  $3.1\% \pm 1.5\%$ , was Bathyarchaeia within the phylum Crenarchaeota. This group, previously known as the miscellaneous Crenarchaeotal group (MCG)<sup>1</sup>, is dominant in anoxic subsurface environments and is known for diverse carbon metabolisms, including methane cycling<sup>2,3</sup>. In terms of bacterial lineages, the most abundant ASVs were assigned to the phyla Proteobacteria ( $17.7\% \pm 2.8\%$ ), Desulfobacterota ( $10.0\% \pm 3.5\%$ ), Planctomycetota ( $5.8\% \pm 2.4\%$ ), Acidobacteriota ( $5.0\% \pm 2.9\%$ ), Sva0485 ( $4.8\% \pm 0.8\%$ ), NB-1j ( $4.7\% \pm 1.7\%$ ), Myxococcota ( $3.9\% \pm 1.2\%$ ), Latescibacterota ( $3.1\% \pm 1.3\%$ ), Bacteroidota ( $2.9\% \pm 2.6\%$ ). Other phyla were present in lower relative abundances, including Chloroflexi ( $0.7\% \pm 0.5\%$ ), Spirochaetota ( $0.5\% \pm 1.0\%$ ), Firmicutes ( $0.1\% \pm 0.2\%$ ), and Fusobacteriota ( $0.1\% \pm 0.1\%$ ).

The dominance of gammaproteobacterial ASVs was primarily attributed to several key groups, including *Gammaproteobacteria Incertae Sedis* ( $5.1 \pm 1.0\%$ ), BD7-8 marine group ( $3.5 \pm 1.7\%$ ), B2M28 ( $3.4 \pm 1.0\%$ ), *Woeseia* ( $2.2 \pm 1.4\%$ ), uncultured *Thiohalorhabdaceae* ( $1.6 \pm 0.7\%$ ), *Gammaproteobacteria AT s2 59* ( $1.4 \pm 0.7\%$ ), and uncultured *Pseudomonadaceae* ( $0.1 \pm 0.1\%$ ). Members of the *Gammaproteobacteria Incertae Sedis* have the ability to oxidize various sulfur species under anoxic conditions<sup>4</sup>. The term "Incertae Sedis" indicates a taxonomic group with uncertain physiology. The BD7-8 marine subgroup consists of anaerobic carbohydrate degraders, often living in symbiosis with marine sediment invertebrates<sup>5</sup>. B2M28, a clone first identified in seagrass-containing marine sediments, closely resembles a sulfur-oxidizing symbiont associated with the bivalve *Codakia orbicularis*<sup>6</sup>, which thrives in marine sediments<sup>7,8</sup>. The genus *Woeseia*, within the order Woesiales, exhibits organoheterotrophic<sup>9</sup> metabolism and facultative chemolithoautotrophy<sup>10,11</sup>, potentially enabling growth on proteinaceous substrates<sup>12</sup>. The family *Thiohalorhabdaceae* includes *Thiohalorhabdus*, a genus of halophilic, facultative anaerobic chemolithoautotrophs<sup>13</sup>. The uncultured bacterial clone AT-s2-59, collected from a hydrothermal vent in the mid-Atlantic Ridge, is a likely sulfur oxidizer within the *Halothiobacillus* group<sup>14</sup>. Additionally, ASVs were annotated to uncultured alphaproteobacterial *Rhodobacteraceae* ( $0.6 \pm 0.4\%$ ), found broadly in marine sediments across various

subgroups (excluding *Roseobacter*) but with limited physiological information<sup>15</sup>. Cultured representatives of this family, however, form symbiotic relationships with aquatic micro- and macroorganisms<sup>16</sup> and are capable of extracellular electron transfer<sup>17</sup>. Following Gammaproteobacteria, Desulfobacterota-associated ASVs were the most abundant. These ASVs represented taxa from the sulfate and mineral reducing Desulfobulbaceae family<sup>18–20</sup>, putative dissimilatory iron reducer Sva1033<sup>21–23</sup>, mixotrophs Syntrophobacterales order<sup>24</sup>, and sulfate reducing genus Halodesulfobivrio<sup>25,26</sup>. Microbes from these taxa have been suggested to perform low chain fatty acid (LCFA) degradation<sup>27,28</sup>.

The whale fall sediment also hosts ASVs annotated to the uncultivated phylum NB1-j, known for hydrocarbon degradation and prevalent in various marine environments. NB1-j may be associated with microalgae, potentially aiding in nitrogen supply<sup>29</sup>. Acidobacteriota (specifically Subgroup\_10 and Subgroup\_23) was also observed; while this lineage is predominant in soil microbiomes where it degrades polysaccharides like chitin and cellulose<sup>30,31</sup>, it has also been detected in marine environments with potential sulfur-cycling functions on the seafloor<sup>32</sup>. The class *Phycisphaerae* within the order Planctomycetes, represented by MSLB9, is involved in the degradation of complex carbohydrates and is commonly found in marine sediments<sup>33</sup>. Within Bacteroidota (5.3 ± 1.2%), we identified an uncultured genus from the Bacteroidetes\_BD2-2 group, which likely degrades proteins and amino acids in anaerobic environments<sup>34</sup>. This group may be associated with methanotrophic archaea and sulfate-reducing bacteria<sup>35</sup>, particularly in methane seep sediments. However, the precise physiological roles of Bacteroidetes in sediments remain largely unresolved. The Sva0485 clade, predominantly known for sulfate and iron reduction<sup>36</sup>, was also present, but its physiology and ecological roles remain unclear due to a lack of microbial isolates or genomes. Within the family Myxococcota (formerly Myxobacteria), we identified *Sandaracinaceae* and the *MidBa8* family. Myxobacteria, often found in marine sediments and cyanobacterial mats<sup>37</sup>, are primarily aerobic but some can utilize alternative electron acceptors<sup>38,39</sup>. Lastly, Latescibacterota, a clade of uncultured microbes, was associated with marine invertebrates and is capable of degrading complex polymers<sup>40</sup>.

The microbial community structure in whale fall sediment, revealed through 16S rRNA gene analysis, highlights a rich presence of anaerobic chitin degraders and sulfate/iron reducers, making this site ideal for studying chitin degradation coupled with iron reduction. Key lineages such as *Bathyarchaeia*, *Desulfobacterota*, and various *Proteobacteria* contribute to carbon and iron cycling in anoxic conditions, supporting diverse metabolic interactions. Additionally, several uncultured groups with potentially unique metabolic roles were identified, suggesting a rich and specialized ecosystem in this deep-sea habitat.

## Laboratory incubations

The whale fall sediments were incubated in macrocosms (25 mL sediment in 60 mL serum vials) containing 0.01 g/mL chitin, 0.013 g/mL PCIO, and minimal sulfate artificial seawater media. The iron incubation (PCIO\_run1) included two transfers at room temperature (RT) and 10°C with three different sulfate conditions: (1) 0.2 mM sulfate, (2) 1 mM sulfate, and (3) 1 mM sulfate + 1 mM molybdate, used as a sulfur source for assimilation. Sodium molybdate was added to inhibit sulfate-reducing bacteria growth<sup>41</sup>. Iron reduction was assessed with a ferrozine assay<sup>42,43</sup>. Colorimetric ferrozine-based assay for the quantitation of iron in cultured cells at each enrichment transfer.

Microbial cultures enriched on PCIO and chitin at 10°C with 0.2 mM sulfate were selected as the inoculum for the primary electrochemical reactor. Although the initial electrochemical enrichment (labeled echem\_run1, EC1) was intended to be conducted at 10°C, repeated failures of the chiller system necessitated incubation at room temperature. Three biological replicates (EC1\_BR1, EC1\_BR2, EC1\_BR3) electrochemical reactors were established, each with working electrodes set at +0.22 V vs. SHE, for 120-day incubation. Controls included an abiotic control (EC1\_AC) without inoculum and an open circuit (EC1\_OC) control with only 0.2 mM sulfate provided for assimilation in all the reactors but could also be used as the electron acceptor, in this case. Planktonic phase was sampled for 16S rRNA gene analysis, external metabolites and analytes, at various intervals of time (day 78, 87, 99, and 119). EC1\_BR1 showed a spike in metabolite production at day 112. Of the 22 metabolites that peaked at this time point, half were amino acids (glutamate, glutamine, threonine, valine, glycine) or intermediates of amino acid biosynthesis or degradation (Supplementary Table: EC1\_BR1\_amino\_acids.csv). Given the relatively lower ammonium accumulation in EC1\_BR1 (Figure 2d), this suggests excess nitrogen may have been expelled not only as free ammonium but also as nitrogen-containing metabolites, possibly in an effort to maintain intracellular C:N ratios. Among the biological replicates, BR3 showed the highest metabolic activity throughout the enrichment period.

To study the formation of a stable anoxic chitin-degrading community, planktonic phase (2 mL) and electrode-attached biomass (scraped from the electrode) from EC1\_BR3 were used as inoculum for a secondary electrochemical incubation (echem\_run2, EC2). The second electrochemical enrichment (EC2), ran from November 2019 to July 2022, a 32 month long incubation period. In the first 20 days, the medium was amended with chitin and simpler organics, such as fumarate and acetate, to facilitate the growth of putative iron oxide reducers. Over the next 300 days, sequential amendments with pyruvate, lactate, glucose, and N-acetylglucosamine (GlcNAc) resulted in similar anodic responses. By day 320, the planktonic phase was replaced with fresh chitin and fresh medium to assess the response of the electrode-attached community over three months. Current production was restored to comparable levels following the addition

of 3 mM GlcNAc. Further 16S rRNA gene sequencing, 16S rRNA FISH coupled with BONCAT and NanoSIMS, chitinase assay, external metabolites and analytes were performed to confirm anaerobic chitin degradation. Finally, two representative species from the microbial community responsible for chitin degradation and mineral reduction were isolated to establish the syntrophic interaction in the electrochemical incubation. Metadata and respective analysis for each electrochemical reactor run and samples collected is provided as supplementary files:

Supplementary\_table\_metadata\_ch\_echem\_run1.xlsx,  
Supplementary\_table\_metadata\_ch\_echem\_run2.xlsx,  
echem\_run1\_CA\_CV\_IC\_exometabolites.html,  
echem\_run2\_CA\_CV\_IC.html,  
echem\_run2\_CA\_chitinase\_exometabolites.html,  
EC1\_BR1\_amino\_acids.csv)

#### Microbial composition in laboratory incubations

The initial electrochemical enrichment (echem\_run1, EC1) was performed using 5 mL of a chitin-iron enriched culture, PCIO (10 C + 1 mM sulfate, second transfer), acting as an inoculum, in triplicate reactors. The inoculum for the electrochemical incubation was dominated by members of Firmicutes, followed by Spirochaetota, Desulfobacterota, and Bacteroidota with minor representation by archaea *Methanosarcinaceae*. The samples for 16S sequencing were analysed from planktonic community after 78, 87, 99, and 119 days of chitin incubation, while the chitin-associated and electrode-associated microbial community was sampled and analysed on only 119 day of chitin incubation. Taxonomic differences among these phases were assessed using ANCOM-BC (p-adjusted method = "fdr") for the EC1\_BR3. Briefly, *Gammaproteobacteria*, *Spirochaetota* (formerly grouped with Alphaproteobacteria), and *Desulfobacterota* (previously Deltaproteobacteria<sup>18</sup>) were detected in all three phases. Within *Gammaproteobacteria*, *Shewanella*, *Psychromonas*, and a novel *Pseudomonadaceae* genus were dominant. Notably, *Shewanella* and *Pseudomonas* are well-studied for extracellular electron transfer (EET)<sup>44,45</sup>, while *Psychromonas* is known for biopolymer degradation under diverse conditions<sup>46</sup>. Within *Spirochaetota*, *Sediminispirochaeta* and *Spirochaeta\_2* were enriched on chitin, while *Sphaerochaeta* was prominent in the planktonic phase. *Desulfobacterota* taxa, including *Trichloromonas* and a novel *Desulfuromonadaceae* genus, were associated with the electrode, while *Halodesulfovibrio* was more abundant on chitin but present in all phases. In the planktonic phase, *Firmicutes*, *Fusobacterota*, and *Bacteroidota* were dominant. Within *Firmicutes*, genera such as *Abyssvirga*, *Vallitalea*, and a novel *Lachnospiraceae* member were uniformly distributed. *Fusobacterota* members, including *Psychrilyobacter* (associated with marine organisms), were enriched in the planktonic phase. On the electrode, *Clostridium\_sensu\_stricto\_7*, *Acetobacterium*, and a novel

*Clostridiaceae* member were prominent. *Cloacimonadota* and *Halobacterota* were also represented.

*Cloacimonadota* was absent in the chitin-associated phase and widely distributed in the planktonic phase consistent with its metabolic versatility and predominant in anaerobic digesters<sup>47</sup>. Their role as acetogenic fermenters<sup>47</sup> has also been suggested.

The planktonic phase (2 mL) and electrode-attached biomass (scraped from the electrode) from EC1\_BR3, was used as an inoculum for a secondary electrochemical incubation (EC2). The predominant microbial taxa in EC2 were consistently present across all biological replicates, inhabiting the planktonic, electrode-attached, and chitin-attached phases. The planktonic phase and chitin-attached community have higher relative abundance of *Pseudomonadaceae* and *Vallitalea* (chitin degraders and secondary consumers). On the other hand, the poised electrode was enriched with *Desulfobacterota* (mineral reducers). Certain families, in low abundances, were distributed evenly across the three phases, including *Sediminispirochaeta* and *Methanobus*. The temporal structure of the planktonic microbial community closely followed anodic current production, which was directly influenced by deliberate modifications in the reactor's planktonic phase. Community richness gradually re-established following the removal of the initial planktonic phase and the amendment of fresh chitin. The primary contributors to richness lowering in the planktonic phase could be attributed to *Trichloromonas*, *Desulfuromonas*, *Spirochaetaceae*, *Abyssivirga*, a novel *Lachnospiraceae*, and *Shewanella*. Despite frequent sampling and replenishment of the media, the planktonic phase was repopulated quickly with *Vallitalea* (*Lachnospiraceae*) and a novel *Pseudomonadaceae*. Meanwhile, *Methanobus* (*Methanosarcinaceae*) and *Bacteroidetes* were represented in low abundances in the planktonic phase throughout the 32 month long incubation.

A co-occurrence network for the electrode-attached biomass (EC2\_BR1-3) illustrates potential relationships within this simplified microbial community, where metabolic interactions balance cooperation and competition, to sustain ecological and metabolic roles (Methods and Figure 4c). According to this analysis, the dominant archaeal lineage, *Methanobus*, a methylotrophic methanogen, presumably consuming methanol and/or methylated compounds, is benefiting from synergistic interactions with genera *Shewanella*, *Trichloromonas*, *Desulfuromonas*, which may produce its substrates. Fermentative *Acetobacterium* and *Spirochaeta\_2*, might contribute to acetate production and support *Desulfuromonas*. Within the network, *Shewanella*, known for its EET capability, interacts with fermenters such as *Clostridium\_sensu\_stricto\_7*, perhaps facilitating carbon and electron flow within the system. *Lachnospiraceae*, a fermentative family, likely breaks down chitin into short-chain fatty acids, supporting *Abyssivirga* and *Desulfuromonas*. *Vallitalea* also co-occurs with many taxa, including *Trichloromonas* and *Shewanella*. *Pseudomonas*, a diverse genus known for biofilm formation, proteolytic activity, EET, and denitrification, maintains diverse interactions that

may enhance community stability. In summary, within the electrochemical incubation, microbial lineages within *Desulfuromonadaceae* family, typically linked to mineral cycling, exhibited positive correlations with methanogens and fermenters, suggesting their involvement in syntrophic interactions via metabolic cross-feeding. This analysis illustrates the metabolic division of labor and revealed the dynamic interplay between a functionally partitioned microbial community, among chitin degraders, fermenters, and electron-transfer microbes, and serves as a strong example of the types of relationships occurring in whalefall sediments to sustain nutrient cycling and microbial activity.

#### N-Acetyl Glucosamine (GlcNAc) metabolism

In our simplified model, the microbial community responsible for chitin degradation and GlcNAc metabolism is treated as one metabolic partner, while the EET-capable microbial community serves as the other partner. The individual half reactions with their corresponding standard Gibbs free energy change ( $\Delta G_r^0$ ; pH 7, 25 °C, 1 bar) and actual Gibbs free energy change ( $\Delta G_r$ ; pH 7.8, 22 °C, 1 bar, ionic strength of 0.7 M, and chemical composition close to the experimental composition), evaluated using the pyCHNOSZ<sup>48</sup> and AqEquil<sup>49</sup> library through WORM portal following the details provided in previous literature<sup>50</sup>.

#### GlcNAc fermentation:

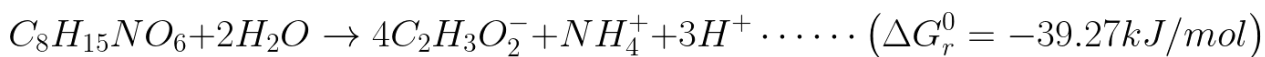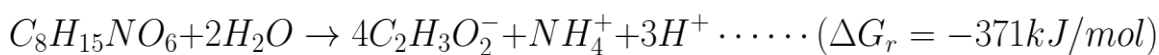

The vast difference between  $\Delta G_r^0$  and  $\Delta G_r$  arises due to minimal acetate accumulation in our electrochemical reactors driving the reaction forward.

#### Acetate oxidation with FeOOH (goethite) reduction:

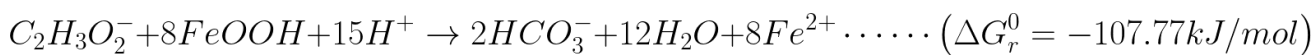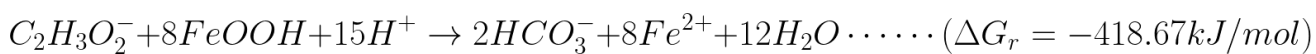

Briefly, GlcNAc fermentation combined with acetate oxidation, as below, results in 8 terminal electrons. The standard gibbs free energy for the reaction at pH 7, 1 bar, and temperature 25 °C is provided below.

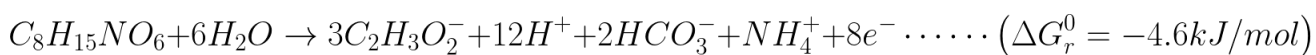

The mathematical model estimates the concentration of acetate over time by incorporating three terms: acetate production via GlcNAc fermentation, acetate consumption for EET, and acetate assimilation for biomass synthesis. The acetate production term is expressed as  $\int x \left( \frac{\partial [GlcNAc]}{\partial t} \right) dt$ , where x represents the stoichiometric ratio of acetate molecules (1, 2, and 3) generated per GlcNAc molecule using stoichiometric balance. The acetate consumption for EET term is given by  $-\int \frac{1}{CE \cdot n_e} \left( \frac{\partial [e^-]}{\partial t} \right) dt$ , where Coulombic efficiency (CE = 75%) and  $n_e=8$  electrons per acetate molecule determine the efficiency of acetate oxidation to electrons. The third term,  $-\int \left( \frac{\partial [Ac]_a}{\partial t} \right) dt$ , is the amount of acetate used by the microbial community for assimilation/biomass production.

Here,

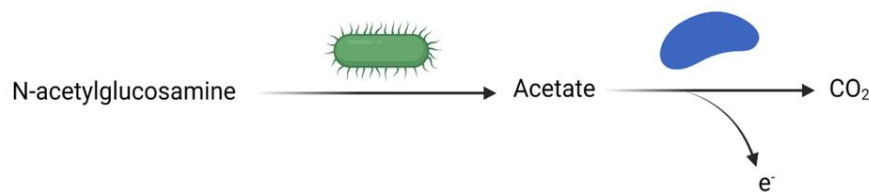

$$[Ac] = \int \frac{d[Ac]_+}{dt} dt - \int \frac{d[Ac]_-}{dt} dt$$

$$[Ac] = \int x \frac{d[GlcNAc]}{dt} dt - \int \frac{d[Ac]_{ox}}{dt} dt - \int \frac{d[Ac]_a}{dt} dt$$

[Ac] = acetate concentration (measured using IC),

[Ac]<sub>+</sub> = increase in acetate concentration,

[Ac]<sub>-</sub> = decrease in acetate concentration,,

x = number of acetate molecules released from GlcNAc metabolism (1,2, or 3) ,

[GlcNAc] = GlcNAc concentration inferred from NH<sub>4</sub><sup>+</sup> concentration,

CE = coulombic efficiency ,

$n_e$  = electrons per acetate molecule , and

[e<sup>-</sup>] = electron concentration.

[Ac]<sub>a</sub> = Acetate used for assimilation for biomass production



1 The model incorporates experimentally derived parameters, including a GlcNAc degradation rate of 0.07  
2 mM/hr, an acetate oxidation rate of 0.0311 mM/hr via extracellular electron transfer (EET), based on a mean  
3 anodic current of 200  $\mu$ A and a coulombic efficiency (CE) of 75%, and an acetate assimilation rate of 0.0032  
4 mM/hr for biomass production. These values indicate that approximately 10% of the produced acetate is  
5 assimilated into biomass. For comparison, reported acetate uptake rates for growing *Geobacter* biofilms<sup>51</sup>  
6 can range from 0.014 to 0.00043 mmol  $\text{Ac}^- \text{h}^{-1} \text{cm}^{-2}$ . When scaled to our system (40 mL reactor volume and  
7 a minimum electrode surface area of 2  $\text{cm}^2$ ), these values correspond to 0.7 to 0.0215 mM/hr, which closely  
8 match the acetate oxidation rate observed in our study. As shown in Supplementary Fig. 3, the time-resolved  
9 measured acetate concentrations (black dots) shows that our measured acetate concentration is a result of  
10 acetate: $\text{NH}_4^+$  stoichiometric ratio between 1:1 to 3:1. The figure illustrates an initial rise in acetate levels,  
11 followed by a decline due to acetate consumption via EET and assimilation.

12 Additionally (in Figure 3), we modeled the net fluxes of acetate and ammonia based on GlcNAc degradation  
13 and observed concentrations over time. Acetate flux was partitioned into EET-driven oxidation (real-time  
14 current, CE: 0.75) and assimilation (assumed at 3.2  $\mu\text{M/hr}$ ), while ammonia assimilation was modeled at 7  
15  $\mu\text{M/hr}$ . Based on these flux values, the acetate-to-ammonia stoichiometric ratio was calculated as  
16 approximately 1.84:1. The model was constrained by maximum acetate (15 mM) and ammonia (3 mM)  
17 produced by 3 mM GlcNAc as input.

18 The data and respective analysis for the above model is provided as the supplementary files and codes:

19 G\_calc\_data\_WORM\_GB.csv,

20 delG\_GlcNAc\_fermentation.html,

21 sample\_IC\_data\_current\_GlcNAc.csv

22 flux\_modelling.html

23

24

25

26

27

28

29

30

1    **Supplementary Figures:**

2    **Supplementary Fig. 1:** Relative abundances of major archaeal and bacterial phyla identified across sediment samples,  
3    highlighting *Proteobacteria*, *Acidobacteria*, *Bacteroidota*, *Sva0485*, *NB1-j*, *Latescibacterota*, *Planctomycetota*,  
4    *Crenarchaeota*, *Spirochaetota*, *Firmicutes*, *Chloroflexi*, *Myxococcota*, and *Desulfobacterota*. These phyla represent the  
5    diverse microbial community structure observed in the sediment core samples, with dominant lineages from  
6    *Desulfobacterota* and *Proteobacteria*, and minor representation from phyla such as *Chloroflexi* and *Firmicutes*.

7

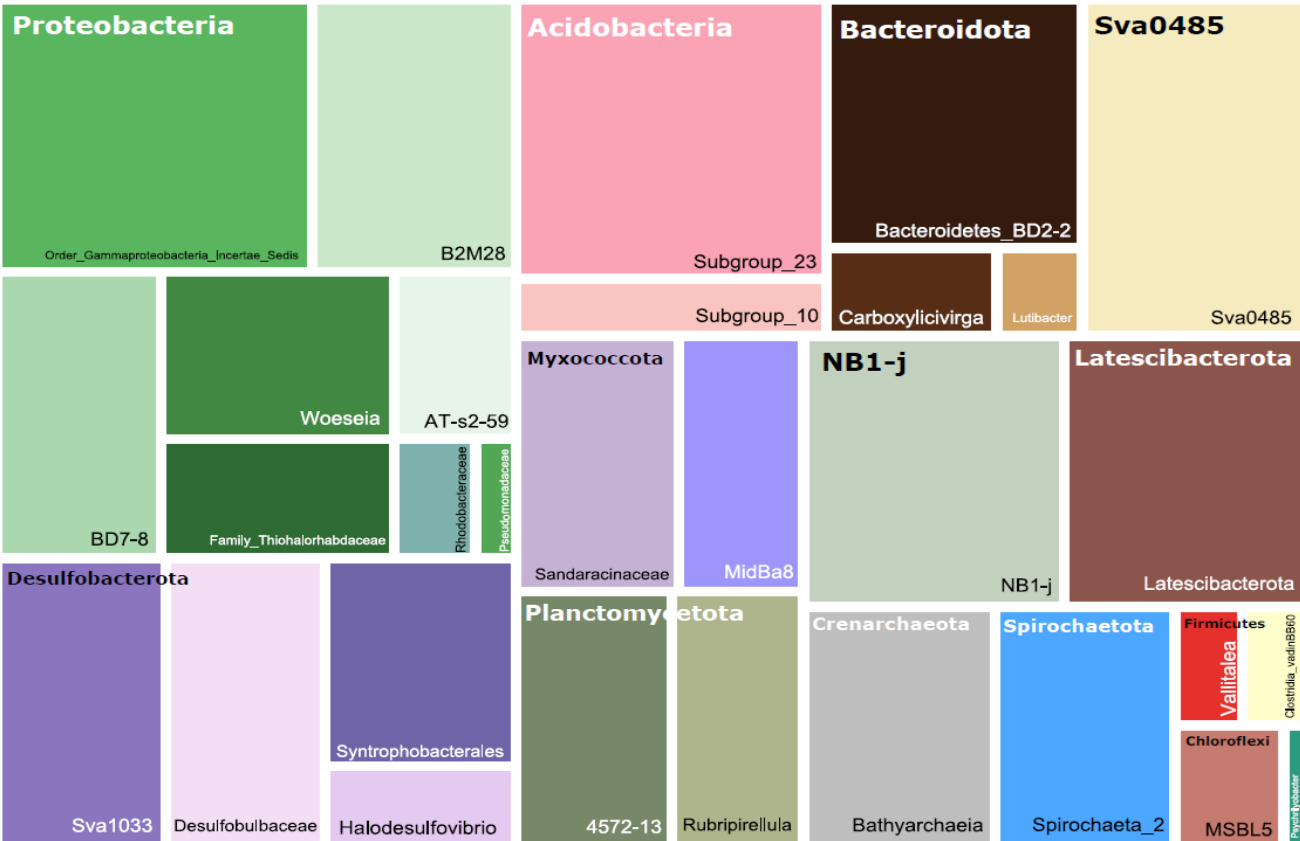

8

9

10

11

12

13

14

15

16

17

18

**Supplementary Fig. 2:** (a) ANCOM-BC heatmap of natural log fold changes in 16S rRNA gene relative abundance for pairwise comparisons (adjusted  $p < 0.05$ ) with chitin versus carbon cloth (electrode-associated) and planktonic versus carbon cloth (electrode-associated) microbial community for BR3 in echem run 1 (EC1\_BR3). (b) Bubble plot showing relative abundances of the respective microbial taxa across chitin, planktonic, and carbon cloth phase.

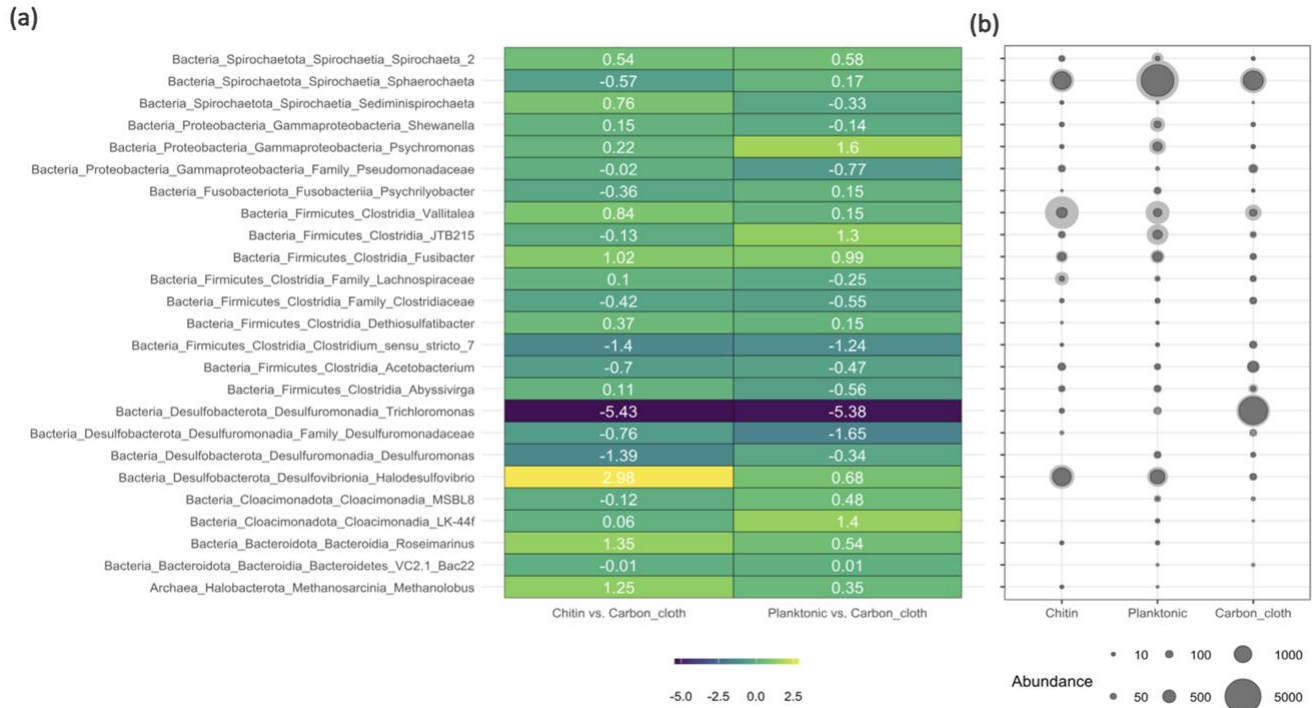

1 **Supplementary Fig. 3:** Exometabolites analysis measured in chitin incubation of EC2\_BR1 and EC2\_BR3 shows trends of  
2 7 unannotated metabolites (with m/z) provided as below. Samples were collected daily.

3

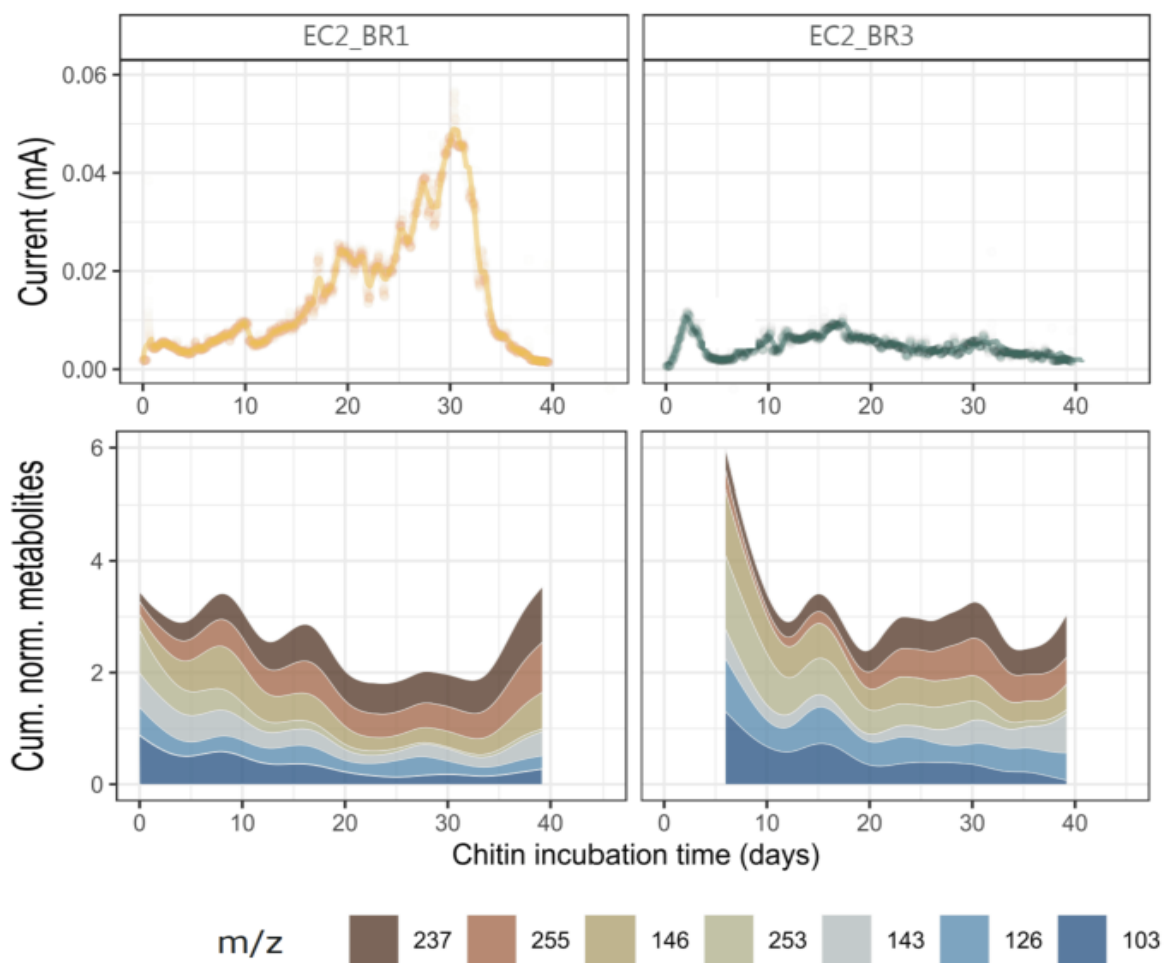

4

5

6

7

8

9

10

11

12

13

14

15

**Supplementary Fig. 4:** Mathematical model depiction of the conversion of GlcNAc into acetate through fermentation, with acetate serving dual roles: as a substrate for oxidation via EET and as a carbon source for biomass assimilation. The standard Gibbs free energy change for GlcNAc fermentation coupled to acetate oxidation is  $-4.56$  kJ/mol, with each GlcNAc molecule potentially yielding 1, 2, or 3 acetate molecules, one ammonia molecule, and eight terminal electrons. The mathematical model simulates acetate profiles under different acetate:GlcNAc ratios (1:1, 2:1, and 3:1), shown as varying gray lines by using experimentally derived parameters: a GlcNAc degradation rate of  $0.07$  mM/hr and an electron production rate of  $0.0311$  mM/hr (based on average anodic current of  $200$   $\mu$ A), and acetate assimilation rate of  $0.0032$  mM/hr. The experimental acetate concentration (black curve) suggests the ratio lies between 1 to 3, due to the heterogeneity within the microbial population. This supports the hypothesis that acetate released during GlcNAc metabolism is sufficient to sustain the activity of EET-capable metabolic partners. The model assumes a coulombic efficiency of 75%.

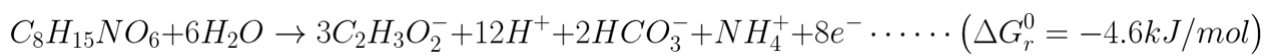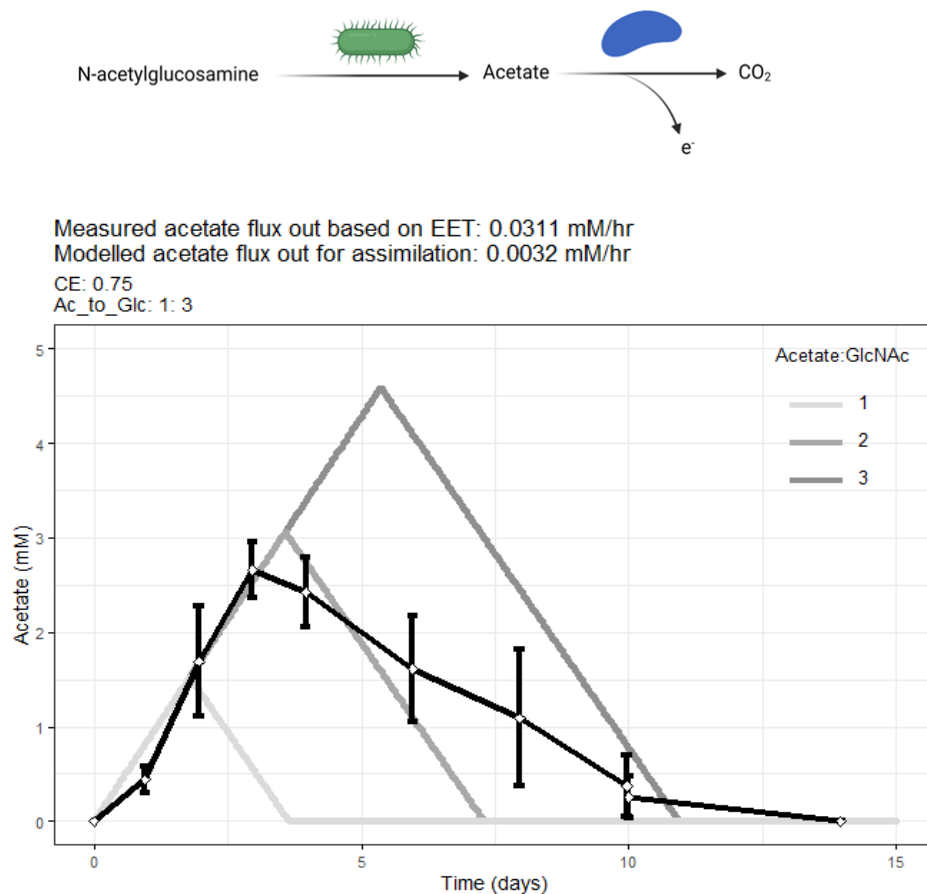

**Supplementary Fig. 5:** NanoSIMS image of  $^{15}\text{N}$  fractional abundance of the killed control amended with  $^{15}\text{N}$ -GlcNAc for incubated planktonic cells in electrochemical run 2 (EC2\_BR3). The planktonic microbes were killed in the control culture by autoclaving at  $121^\circ\text{C}$  for 45 min. No enrichment of  $^{15}\text{N}$  was detected above background levels (a) NanoSIMS ion image of total biomass ( $^{14}\text{N}^{12}\text{C}^-$ ) showing distribution of planktonic cells in the raster image, where values in scale bar represent the pixel counts. (b) Corresponding fractional abundance  $^{15}\text{N}$  image scaled to natural abundance  $^{15}\text{N}$  (0.0036),

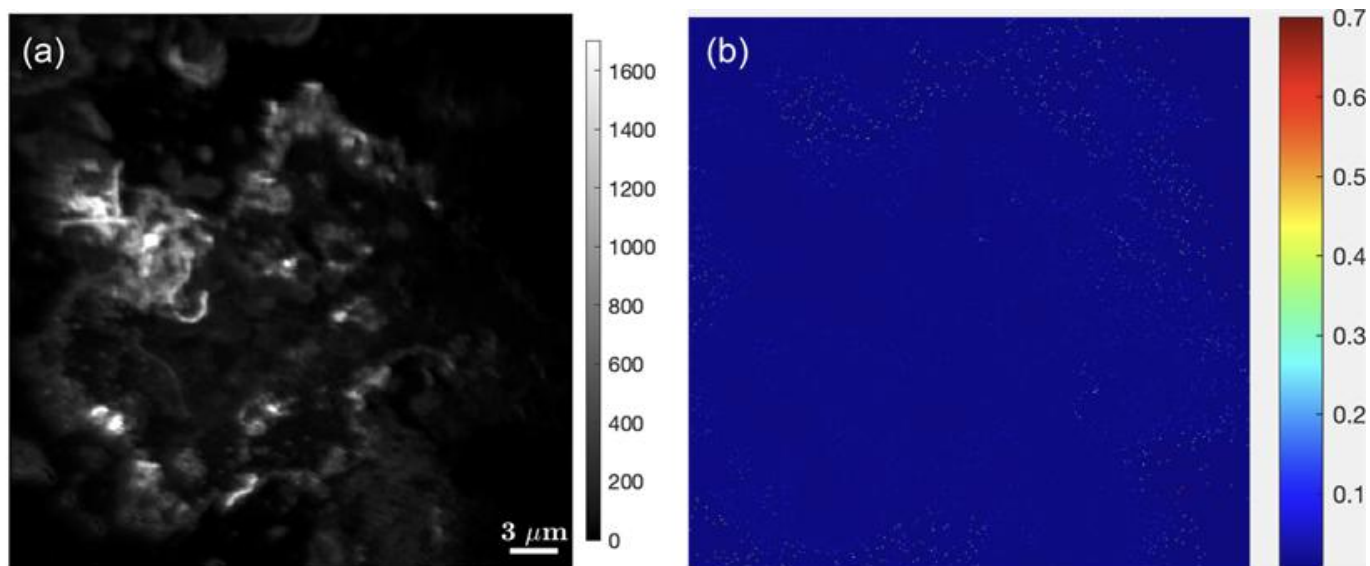

**Supplementary Fig. 6:** Phylogenetic tree illustrating the taxonomic affiliation of anaerobic isolates obtained from electrochemical run 2, biological replicate 1 (EC2\_BR1). The isolates include *Vallitalea* sp. (sp2), enriched using 3 mM N-acetylglucosamine (GlcNAc), and *Trichloromonas* sp. (sp17) and *Halodesulfovibrio* sp. (sp16), enriched using 10 mM sodium acetate and 20 mM sodium fumarate. The tree was constructed using the SILVA 138.1 reference database and the ARB software (v7.1.0). The tree was generated with the Maximum Likelihood algorithm implemented in RAXML version 8, applying the GTRGAMMA substitution model. GTR rate parameters were optimized using the BFGS method. Bootstrap support values (based on 100 non-parametric replicates) are displayed for nodes with  $\geq 85\%$  support. Isolate sequences shown in bold represent shorter sequences that were incorporated into the tree using parsimony placement. Full-length 16S rRNA gene sequences obtained using PacBio from EC1\_BR3, whose carbon cloth electrode (EI) served as the inoculum for the EC2 reactors, are labeled with names starting with "EC1". The tree is rooted with *Shewanella* and *Vibrio* as the designated outgroup taxa.

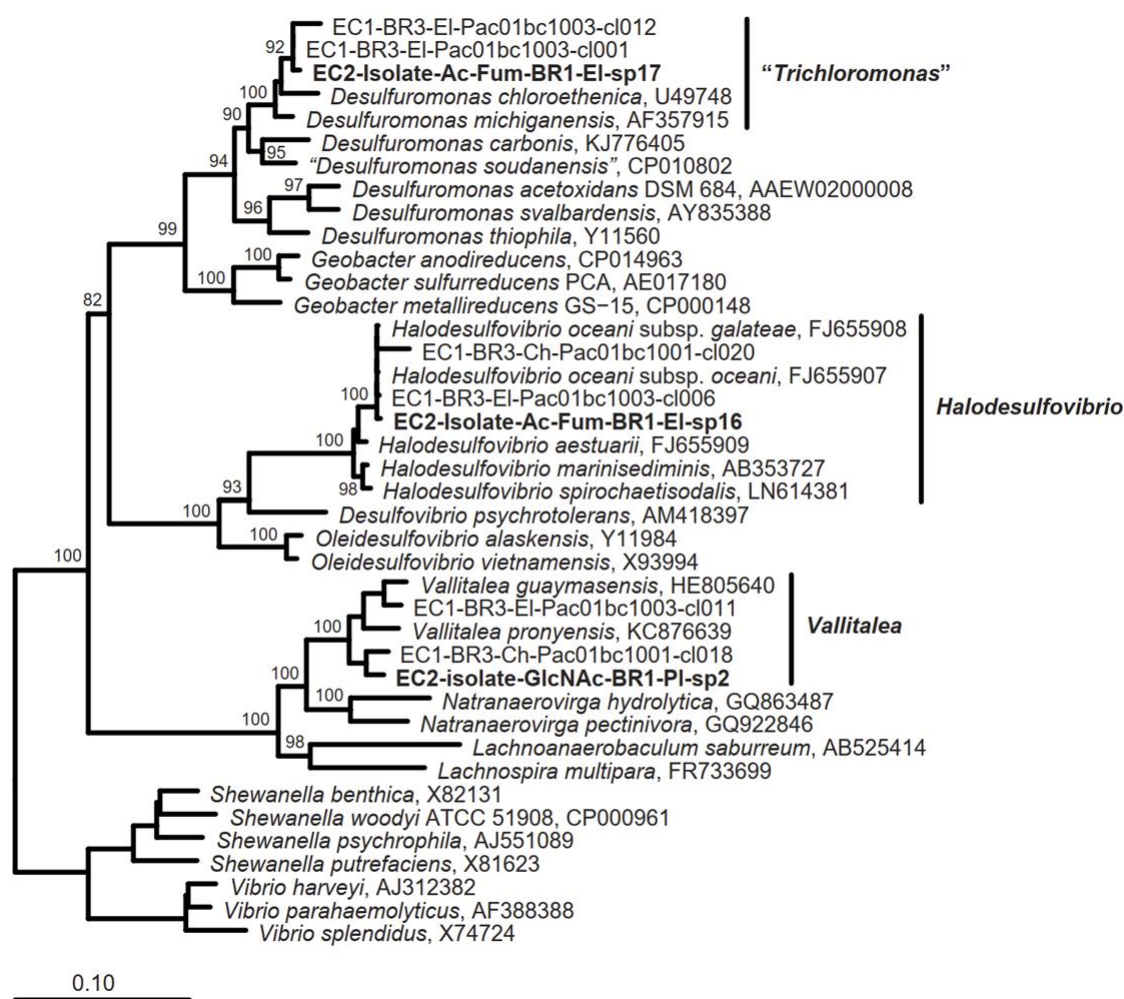

**Supplementary Fig. 7:** Photo taken by ROV Doc Ricketts of whalefall (WF1018) in 2005 (left) and December, 2018 (right) shows deep-sea sediment sampling at the whale fall site WF1018 in Monterey Canyon, at a depth of approximately 1018 meters. In the center of the right image, a portion of whale bone is still visible, partially embedded in the seafloor, with a sea anemone anchored nearby. This bone is part of the blue whale skeleton that continues to influence local biogeochemistry and microbial community composition nearly two decades after emplacement. Several push-core samplers are deployed using the manipulator arm of a remotely operated vehicle ROV Doc Ricketts to collect sediments for microbiological and geochemical analysis.

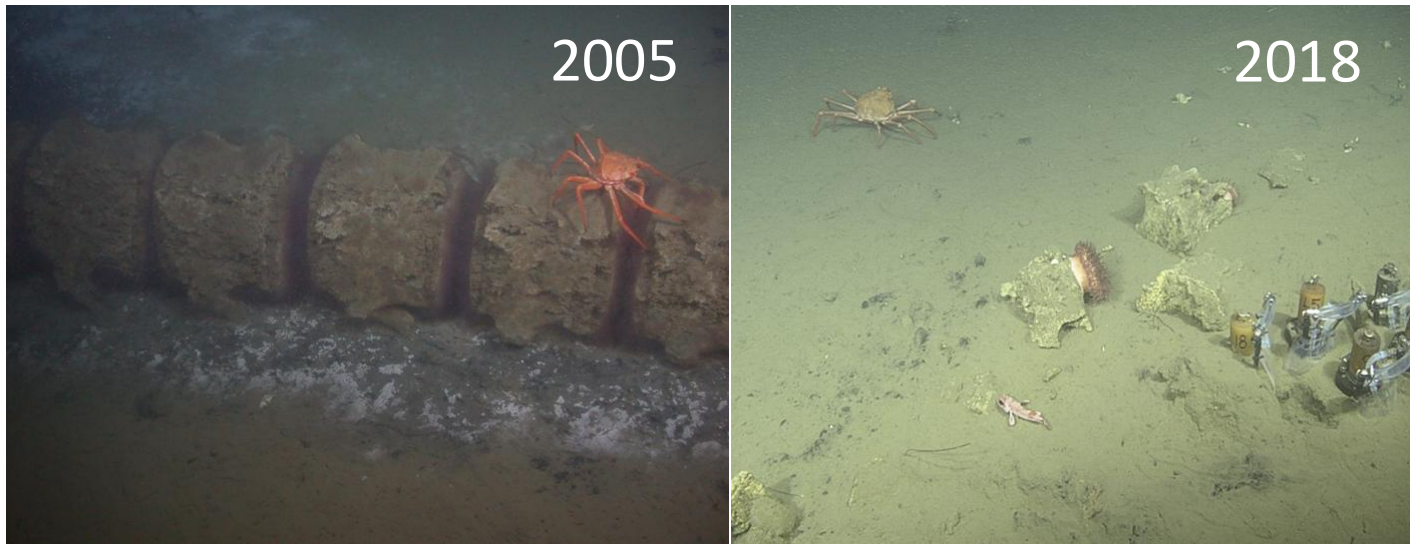



**Supplementary Fig. 8:** The illustration provides the spatial and temporal dynamics of microbial interactions facilitating chitin degradation and extracellular electron transfer (EET) in marine sediment-derived electrochemical incubations. Initially (left), a complex and metabolically diverse community—including chitin degraders, fermenters, sulfate reducers, iron reducers, and methanogens—mediates the degradation of insoluble chitin into oligomers (GlcNAc)<sub>x</sub> and monomers (e.g., acetate, lactate, glucose), which fuel downstream anaerobic respiration (sulfate reduction and iron oxide reduction). Upon incubation in an electrochemical reactor with a poised working electrode (WE), selective pressure under anoxic, redox-controlled conditions enriches for microbes capable of chitin degradation and extracellular electron transfer (EET). This process eventually led to the isolation of two key taxa belonging to genus *Vallitalea* and *Trichloromonas*. Reincubation of these two isolates in a minimal electrochemical setup (right) reconstituted the core syntrophic interaction, *Vallitalea* sp. (sp2) catalyzes chitin degradation and fermentation, producing acetate, which is in turn oxidised by *Trichloromonas* sp. (sp17) via EET to the electrode. The left-to-right transition thus reflects community succession and functional partnerships, revealing the metabolic division of labor required to couple particulate organic matter degradation with electron flow in anoxic marine deep-sea sediments.

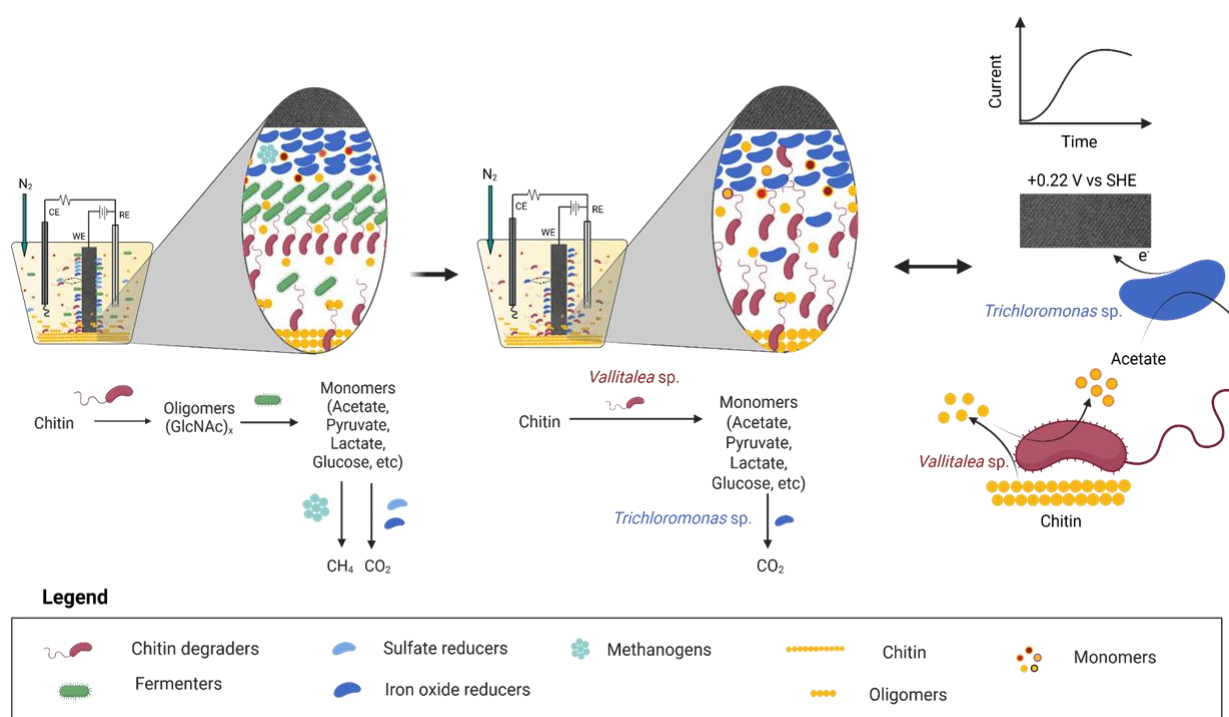

## References

1. Meng, J. *et al.* Genetic and functional properties of uncultivated MCG archaea assessed by metagenome and gene expression analyses. *ISME J.* **8**, 650–659 (2014).
2. Hou, J. *et al.* Taxonomic and carbon metabolic diversification of Bathyarchaeia during its coevolution history with early Earth surface environment. *Sci. Adv.* **9**, eadf5069 (2023).
3. Evans, P. N. *et al.* Methane metabolism in the archaeal phylum Bathyarchaeota revealed by genome-centric metagenomics. *Science* **350**, 434–438 (2015).
4. Zoss, R. *et al.* Microbial communities associated with phosphogenic sediments and phosphoclast-associated DNA of the Benguela upwelling system. *Geobiology* **17**, 76–90 (2019).
5. Deng, L. *et al.* Macrofaunal control of microbial community structure in continental margin sediments. *Proc. Natl. Acad. Sci.* **117**, 15911–15922 (2020).
6. Caro, A., Gros, O., Got, P., De Wit, R. & Troussellier, M. Characterization of the Population of the Sulfur-Oxidizing Symbiont of *Codakia orbicularis* (Bivalvia, Lucinidae) by Single-Cell Analyses. *Appl. Environ. Microbiol.* **73**, 2101–2109 (2007).
7. Albert, S. *et al.* Phytoplankton settling quality has a subtle but significant effect on sediment microeukaryotic and bacterial communities. *Sci. Rep.* **11**, 24033 (2021).
8. Ravenschlag, K., Sahm, K. & Amann, R. Quantitative Molecular Analysis of the Microbial Community in Marine Arctic Sediments (Svalbard). *Appl. Environ. Microbiol.* **67**, 387–395 (2001).
9. Du, Z.-J., Wang, Z.-J., Zhao, J.-X. & Chen, G.-J. *Woeseia oceani* gen. nov., sp. nov., a chemoheterotrophic member of the order Chromatiales, and proposal of *Woeseiaceae* fam. nov. *Int. J. Syst. Evol. Microbiol.* **66**, 107–112 (2016).
10. Mußmann, M., Pjevac, P., Krüger, K. & Dykma, S. Genomic repertoire of the *Woeseiaceae*/JTB255, cosmopolitan and abundant core members of microbial communities in marine sediments. *ISME J.* **11**, 1276–1281 (2017).
11. Baker, B. J., Lazar, C. S., Teske, A. P. & Dick, G. J. Genomic resolution of linkages in carbon, nitrogen, and sulfur cycling among widespread estuary sediment bacteria. *Microbiome* **3**, 14 (2015).

- 1 12. Hoffmann, K. *et al.* Diversity and metabolism of Woeseiales bacteria, global members of marine  
2 sediment communities. *ISME J.* **14**, 1042–1056 (2020).
- 3 13. Sorokin, D. Y. & Merkel, A. Y. Thiohalorhabdaceae fam. nov. in *Bergey's Manual of Systematics of*  
4 *Archaea and Bacteria* 1–2 (John Wiley & Sons, Ltd, 2023). doi:10.1002/9781118960608.fbm00393.
- 5 14. López-García, P. *et al.* Bacterial diversity in hydrothermal sediment and epsilonproteobacterial  
6 dominance in experimental microcolonizers at the Mid-Atlantic Ridge. *Environ. Microbiol.* **5**, 961–976  
7 (2003).
- 8 15. Pohlner, M. *et al.* The Majority of Active Rhodobacteraceae in Marine Sediments Belong to Uncultured  
9 Genera: A Molecular Approach to Link Their Distribution to Environmental Conditions. *Front. Microbiol.*  
10 **10**, (2019).
- 11 16. Pujalte, M. J., Lucena, T., Ruvira, M. A., Arahal, D. R. & Macián, M. C. The Family Rhodobacteraceae. in  
12 *The Prokaryotes: Alphaproteobacteria and Betaproteobacteria* (eds. Rosenberg, E., DeLong, E. F., Lory,  
13 S., Stackebrandt, E. & Thompson, F.) 439–512 (Springer, Berlin, Heidelberg, 2014). doi:10.1007/978-3-  
14 642-30197-1\_377.
- 15 17. Jangir, Y. *et al.* In situ Electrochemical Studies of the Terrestrial Deep Subsurface Biosphere at the  
16 Sanford Underground Research Facility, South Dakota, USA. *Front. Energy Res.* **7**, (2019).
- 17 18. Waite, D. W. *et al.* Proposal to reclassify the proteobacterial classes Deltaproteobacteria and Oligoflexia,  
18 and the phylum Thermodesulfobacteria into four phyla reflecting major functional capabilities. *Int. J.*  
19 *Syst. Evol. Microbiol.* **70**, 5972–6016 (2020).
- 20 19. Song, J., Hwang, J., Kang, I. & Cho, J.-C. A sulfate-reducing bacterial genus, Desulfosediminicola gen.  
21 nov., comprising two novel species cultivated from tidal-flat sediments. *Sci. Rep.* **11**, 19978 (2021).
- 22 20. Ward, L. M., Bertran, E. & Johnston, D. T. Expanded Genomic Sampling Refines Current Understanding of  
23 the Distribution and Evolution of Sulfur Metabolisms in the Desulfobulbales. *Front. Microbiol.* **12**, (2021).
- 24 21. Buongiorno, J. *et al.* Complex Microbial Communities Drive Iron and Sulfur Cycling in Arctic Fjord  
25 Sediments. *Appl. Environ. Microbiol.* **85**, e00949-19 (2019).
- 26 22. Wunder, L. C. *et al.* Iron and sulfate reduction structure microbial communities in (sub-)Antarctic

sediments. *ISME J.* **15**, 3587–3604 (2021).

23. Tu, T.-H. *et al.* Microbial Community Composition and Functional Capacity in a Terrestrial Ferruginous, Sulfate-Depleted Mud Volcano. *Front. Microbiol.* **8**, (2017).

24. Kuever, J., Rainey, F. A. & Widdel, F. Syntrophobacterales ord. nov. in *Bergey's Manual of Systematics of Archaea and Bacteria* 1–1 (John Wiley & Sons, Ltd, 2015). doi:10.1002/9781118960608.obm00089.

25. Takii, S. *et al.* Desulfovibrio marinisediminis sp. nov., a novel sulfate-reducing bacterium isolated from coastal marine sediment via enrichment with Casamino acids. *Int. J. Syst. Evol. Microbiol.* **58**, 2433–2438 (2008).

26. Shivani, Y., Subhash, Y., Sasikala, Ch. & Ramana, Ch. V. Halodesulfovibrio spirochaetisodalis gen. nov. sp. nov. and reclassification of four Desulfovibrio spp. *Int. J. Syst. Evol. Microbiol.* **67**, 87–93 (2017).

27. Singh, S. *et al.* Microbial community assembly and dynamics in Granular, Fixed-Biofilm and planktonic microbiomes valorizing Long-Chain fatty acids at 20 °C. *Bioresour. Technol.* **343**, 126098 (2022).

28. Yin, X. *et al.* Unexpected carbon utilization activity of sulfate-reducing microorganisms in temperate and permanently cold marine sediments. *ISME J.* **18**, wrad014 (2024).

29. Pushpakumara, B. L. D. U., Tandon, K., Willis, A. & Verbruggen, H. Unravelling microalgal-bacterial interactions in aquatic ecosystems through 16S rRNA gene-based co-occurrence networks. *Sci. Rep.* **13**, 2743 (2023).

30. Kielak, A. M., Barreto, C. C., Kowalchuk, G. A., van Veen, J. A. & Kuramae, E. E. The Ecology of Acidobacteria: Moving beyond Genes and Genomes. *Front. Microbiol.* **7**, (2016).

31. Huber, K. J., Pester, M., Eichorst, S. A., Navarrete, A. A. & Foesel, B. U. Editorial: Acidobacteria – Towards Unraveling the Secrets of a Widespread, Though Enigmatic, Phylum. *Front. Microbiol.* **13**, (2022).

32. Flieder, M. *et al.* Novel taxa of Acidobacteriota implicated in seafloor sulfur cycling. *ISME J.* **15**, 3159–3180 (2021).

33. Spring, S., Bunk, B., Spröer, C., Rohde, M. & Klenk, H.-P. Genome biology of a novel lineage of planctomycetes widespread in anoxic aquatic environments. *Environ. Microbiol.* **20**, 2438–2455 (2018).

34. Mei, R., Nobu, M. K., Narihiro, T. & Liu, W.-T. Metagenomic and Metatranscriptomic Analyses Revealed

- Uncultured Bacteroidales Populations as the Dominant Proteolytic Amino Acid Degraders in Anaerobic Digesters. *Front. Microbiol.* **11**, (2020).
35. Trembath-Reichert, E., Case, D. H. & Orphan, V. J. Characterization of microbial associations with methanotrophic archaea and sulfate-reducing bacteria through statistical comparison of nested Magneto-FISH enrichments. *PeerJ* **4**, e1913 (2016).
36. Tan, S. *et al.* Insights into ecological role of a new deltaproteobacterial order Candidatus Acidulodesulfobacterales by metagenomics and metatranscriptomics. *ISME J.* **13**, 2044–2057 (2019).
37. Brinkhoff, T. *et al.* Biogeography and phylogenetic diversity of a cluster of exclusively marine myxobacteria. *ISME J.* **6**, 1260–1272 (2012).
38. Sanford, R. A., Cole, J. R. & Tiedje, J. M. Characterization and Description of Anaeromyxobacter dehalogenans gen. nov., sp. nov., an Aryl-Halo-respiring Facultative Anaerobic Myxobacterium. *Appl. Environ. Microbiol.* **68**, 893–900 (2002).
39. Li, L. *et al.* Globally distributed Myxococcota with photosynthesis gene clusters illuminate the origin and evolution of a potentially chimeric lifestyle. *Nat. Commun.* **14**, 6450 (2023).
40. Youssef, N. H. *et al.* In Silico Analysis of the Metabolic Potential and Niche Specialization of Candidate Phylum ‘Latescibacteria’ (WS3). *PLOS ONE* **10**, e0127499 (2015).
41. Biswas, K. C., Woodards, N. A., Xu, H. & Barton, L. L. Reduction of molybdate by sulfate-reducing bacteria. *BioMetals* **22**, 131–139 (2009).
42. Riemer, J., Hoepken, H. H., Czerwinska, H., Robinson, S. R. & Dringen, R. Colorimetric ferrozine-based assay for the quantitation of iron in cultured cells. *Anal. Biochem.* **331**, 370–375 (2004).
43. Stookey, L. L. Ferrozine---a new spectrophotometric reagent for iron. *Anal. Chem.* **42**, 779–781 (1970).
44. Saunders, S. H. *et al.* Extracellular DNA Promotes Efficient Extracellular Electron Transfer by Pyocyanin in *Pseudomonas aeruginosa* Biofilms. *Cell* **182**, 919-932.e19 (2020).
45. Xu, S., Barrozo, A., Tender, L. M., Krylov, A. I. & El-Naggar, M. Y. Multiheme Cytochrome Mediated Redox Conduction through *Shewanella oneidensis* MR-1 Cells. (2018) doi:10.1021/jacs.8b05104.
46. Zhang, W. *et al.* Genome Reduction in *Psychromonas* Species within the Gut of an Amphipod from the

Ocean's Deepest Point. *mSystems* **3**, 10.1128/msystems.00009-18 (2018).

47. Williams, T. J., Allen, M. A., Berengut, J. F. & Cavicchioli, R. Shedding Light on Microbial "Dark Matter": Insights Into Novel Cloacimonadota and Omnitrophota From an Antarctic Lake. *Front. Microbiol.* **12**, (2021).

48. Boyer, G. pyCHNOSZ: Python wrapper for the thermodynamic package CHNOSZ. Zenodo (2024).

49. Boyer, G., Robare, J., Park, N., Ely, T. & Shock, E. AqEquil: Python package for aqueous geochemical speciation. Zenodo (2025).

50. Amend, J. P. & LaRowe, D. E. Minireview: demystifying microbial reaction energetics. *Environ. Microbiol.* **21**, 3539–3547 (2019).

51. Korth, B., Kretzschmar, J., Bartz, M., Kuchenbuch, A. & Harnisch, F. Determining incremental coulombic efficiency and physiological parameters of early stage *Geobacter* spp. enrichment biofilms. *PLOS ONE* **15**, e0234077 (2020).
